# Supplementary material
Source: HighWire-hosted journal article supplement (https://www.cmajopen.ca/highwire/filestream/84926/field_highwire_adjunct_files/0/2020-0086-1-at.pdf)
Supplement: 2020-0086-1-at.pdf [file 2020-0086-1-at.pdf]

## Supplementary Tables

**Table S1. Communications by lobbying registrants, registered with subject matters related to marketing to kids and Bill S-228 in the Registry of Lobbyists, summarized by government institution and stakeholder type**

| Government Institution                                      | Industry Stakeholders    |                                               |                                          | Non-Industry Stakeholders |                                               |                                              | All Stakeholders         |                                     |
|-------------------------------------------------------------|--------------------------|-----------------------------------------------|------------------------------------------|---------------------------|-----------------------------------------------|----------------------------------------------|--------------------------|-------------------------------------|
|                                                             | Number of communications | % of communications in government institution | % of industry stakeholder communications | Number of communications  | % of communications in government institution | % of non-industry stakeholder communications | Number of communications | % of all stakeholder communications |
| House of Commons                                            | 905                      | 73.8                                          | 31.6                                     | 321                       | 26.2                                          | 58.2                                         | 1226                     | 35.9                                |
| Health Canada                                               | 311                      | 83.8                                          | 10.9                                     | 60                        | 16.2                                          | 10.9                                         | 371                      | 10.9                                |
| Agriculture and Agri-Food Canada                            | 322                      | 97.3                                          | 11.2                                     | 9                         | 2.7                                           | 1.6                                          | 331                      | 9.7                                 |
| Innovation, Science and Economic Development Canada         | 316                      | 99.4                                          | 11.0                                     | 2                         | 0.6                                           | 0.4                                          | 318                      | 9.3                                 |
| Senate of Canada                                            | 134                      | 59.8                                          | 4.7                                      | 90                        | 40.2                                          | 16.3                                         | 224                      | 6.6                                 |
| Global Affairs Canada                                       | 171                      | 100.0                                         | 6.0                                      | 0                         | 0.0                                           | 0.0                                          | 171                      | 5.0                                 |
| Canadian Heritage                                           | 153                      | 98.1                                          | 5.3                                      | 3                         | 1.9                                           | 0.5                                          | 156                      | 4.6                                 |
| Prime Minister's Office                                     | 139                      | 92.1                                          | 4.8                                      | 12                        | 7.9                                           | 2.2                                          | 151                      | 4.4                                 |
| Finance Canada                                              | 86                       | 87.8                                          | 3.0                                      | 12                        | 12.2                                          | 2.2                                          | 98                       | 2.9                                 |
| Treasury Board of Canada Secretariat                        | 75                       | 83.3                                          | 2.6                                      | 15                        | 16.7                                          | 2.7                                          | 90                       | 2.6                                 |
| Privy Council Office                                        | 38                       | 88.4                                          | 1.3                                      | 5                         | 11.6                                          | 0.9                                          | 43                       | 1.3                                 |
| Canadian Radio-television and Telecommunications Commission | 39                       | 100.0                                         | 1.4                                      | 0                         | 0.0                                           | 0.0                                          | 39                       | 1.1                                 |
| Environment and Climate Change Canada                       | 27                       | 96.4                                          | 0.9                                      | 1                         | 3.6                                           | 0.2                                          | 28                       | 0.8                                 |
| Canadian Food Inspection Agency                             | 26                       | 100.0                                         | 0.9                                      | 0                         | 0.0                                           | 0.0                                          | 26                       | 0.8                                 |

Appendix 1, as supplied by the authors. Appendix to: Mulligan C, Jawad A, Potvin Kent M et al. Stakeholder interactions with the federal government related to Bill S-228 and marketing to kids in Canada: a quantitative descriptive study. *CMAJ Open* 2021. DOI:10.9778/cmajo.20200086. Copyright © 2021 The Author(s) or their employer(s). To receive this resource in an accessible format, please contact us at [cmajgroup@cmaj.ca](mailto:cmajgroup@cmaj.ca).

|                                              |    |       |     |   |       |     |    |     |
|----------------------------------------------|----|-------|-----|---|-------|-----|----|-----|
| Public Safety Canada                         | 24 | 100.0 | 0.8 | 0 | 0.0   | 0.0 | 24 | 0.7 |
| Employment and Social Development Canada     | 16 | 88.9  | 0.6 | 2 | 11.1  | 0.4 | 18 | 0.5 |
| Transport Canada                             | 15 | 100.0 | 0.5 | 0 | 0.0   | 0.0 | 15 | 0.4 |
| Infrastructure Canada                        | 12 | 85.7  | 0.4 | 2 | 14.3  | 0.4 | 14 | 0.4 |
| Competition Bureau Canada                    | 11 | 100.0 | 0.4 | 0 | 0.0   | 0.0 | 11 | 0.3 |
| Public Services and Procurement Canada       | 10 | 100.0 | 0.3 | 0 | 0.0   | 0.0 | 10 | 0.3 |
| Canada Revenue Agency                        | 8  | 88.9  | 0.3 | 1 | 11.1  | 0.2 | 9  | 0.3 |
| Public Health Agency of Canada               | 4  | 50.0  | 0.1 | 4 | 50.0  | 0.7 | 8  | 0.2 |
| Immigration, Refugees and Citizenship Canada | 4  | 80.0  | 0.1 | 1 | 20.0  | 0.2 | 5  | 0.1 |
| Intergovernmental Affairs Secretariat        | 2  | 40.0  | 0.1 | 3 | 60.0  | 0.5 | 5  | 0.1 |
| Justice Canada                               | 5  | 100.0 | 0.2 | 0 | 0.0   | 0.0 | 5  | 0.1 |
| Indigenous and Northern Affairs Canada       | 0  | 0.0   | 0.0 | 3 | 100.0 | 0.5 | 3  | 0.1 |
| Status of Women Canada                       | 2  | 66.7  | 0.1 | 1 | 33.3  | 0.2 | 3  | 0.1 |
| Communications Security Establishment Canada | 2  | 100.0 | 0.1 | 0 | 0.0   | 0.0 | 2  | 0.1 |
| Indigenous Services Canada                   | 0  | 0.0   | 0.0 | 2 | 100.0 | 0.4 | 2  | 0.1 |
| National Defence                             | 1  | 50.0  | 0.0 | 1 | 50.0  | 0.2 | 2  | 0.1 |
| Statistics Canada                            | 1  | 50.0  | 0.0 | 1 | 50.0  | 0.2 | 2  | 0.1 |
| Canadian Dairy Commission                    | 1  | 100.0 | 0.0 | 0 | 0.0   | 0.0 | 1  | 0.0 |
| Canadian Institutes of Health Research       | 0  | 0.0   | 0.0 | 1 | 100.0 | 0.2 | 1  | 0.0 |
| National Capital Commission                  | 1  | 100.0 | 0.0 | 0 | 0.0   | 0.0 | 1  | 0.0 |
| Natural Resources Canada                     | 1  | 100.0 | 0.0 | 0 | 0.0   | 0.0 | 1  | 0.0 |

|                                                        |      |       |       |     |      |       |      |       |
|--------------------------------------------------------|------|-------|-------|-----|------|-------|------|-------|
| Office of the<br>Commissioner of<br>Official Languages | 1    | 100.0 | 0.0   | 0   | 0.0  | 0.0   | 1    | 0.0   |
| Rural Economic<br>Development                          | 1    | 100.0 | 0.0   | 0   | 0.0  | 0.0   | 1    | 0.0   |
| Service Canada                                         | 1    | 100.0 | 0.0   | 0   | 0.0  | 0.0   | 1    | 0.0   |
| Shared Services<br>Canada                              | 1    | 100.0 | 0.0   | 0   | 0.0  | 0.0   | 1    | 0.0   |
| All Government<br>Institutions                         | 2866 | 83.9  | 100.0 | 552 | 16.1 | 100.0 | 3418 | 100.0 |
